# Supplementary material for: A ZIP6-ZIP10 heteromer controls NCAM1 phosphorylation and integration into focal adhesion complexes during epithelial-to-mesenchymal transition
Source: PubMed Central journal article supplement (PMC5241876; doi:10.1038/srep40313), 2017-01-18
Supplement: srep40313-s1.pdf [file srep40313-s1.pdf]

November 24, 2016

**SUPPLEMENTARY INFORMATION**

**to manuscript titled**

**'A ZIP6-ZIP10 heteromer controls GSK3-dependent NCAM1 phosphorylation and integration into focal adhesion complexes during epithelial-to-mesenchymal transition'**

Dylan Brethour<sup>1,2</sup>, Mohadeseh Mehrabian<sup>1,2</sup>, Declan Williams<sup>1</sup>, Xinzhu Wang<sup>1,2</sup>, Farinaz Ghodrati<sup>1,2</sup>, Sepehr Ehsani<sup>1,3</sup>, Elizabeth A. Rubie<sup>4</sup>, James R. Woodgett<sup>4</sup>, Jean Sevalle<sup>1</sup>, Zhengrui Xi<sup>1</sup>, Ekaterina Rogaeva<sup>1,5</sup>, Gerold Schmitt-Ulms<sup>1,2\*</sup>

<sup>1</sup>Tanz Centre for Research in Neurodegenerative Diseases, University of Toronto,

<sup>2</sup>Department of Laboratory Medicine & Pathobiology, University of Toronto, Ontario, Canada.

<sup>3</sup>Whitehead Institute for Biomedical Research, Cambridge, MA, USA.

<sup>4</sup>Lunenfeld-Tanenbaum Research Institute, Mount Sinai Hospital, Toronto, Ontario, Canada

<sup>5</sup>Department of Neurology, University of Toronto, Ontario, Canada.

**Fig S1. Design and genomic validation of CRISPR-Cas9 nickase edited mouse ZIP6 knockout NMuMG cells.**

(a) Exon and intron structure of mouse *Slc39a6*. (b) Targeting the mouse *Slc39a6* Exon 1 locus with a paired CRISPR-Cas9 nickase design using gRNAs 'a' and 'b'. (c) Genomic sequence chromatograms of wt and ZIP6 ko clones with nucleotide residues missing in the ZIP6 ko clone highlighted in yellow. (d) Analysis of genomic PCR sequencing results with revealed that the 2-nucleotide deletion led to the formation of premature STOP codon. Note that due to the presence of additional introns downstream of the translation termination signal , the host-encoded nonsense-mediated decay program is expected to degrade the mutant transcripts, thereby largely precluding the formation of the truncated ZIP6 protein in the ZIP6 ko NMuMG clone.

**Figure S1**

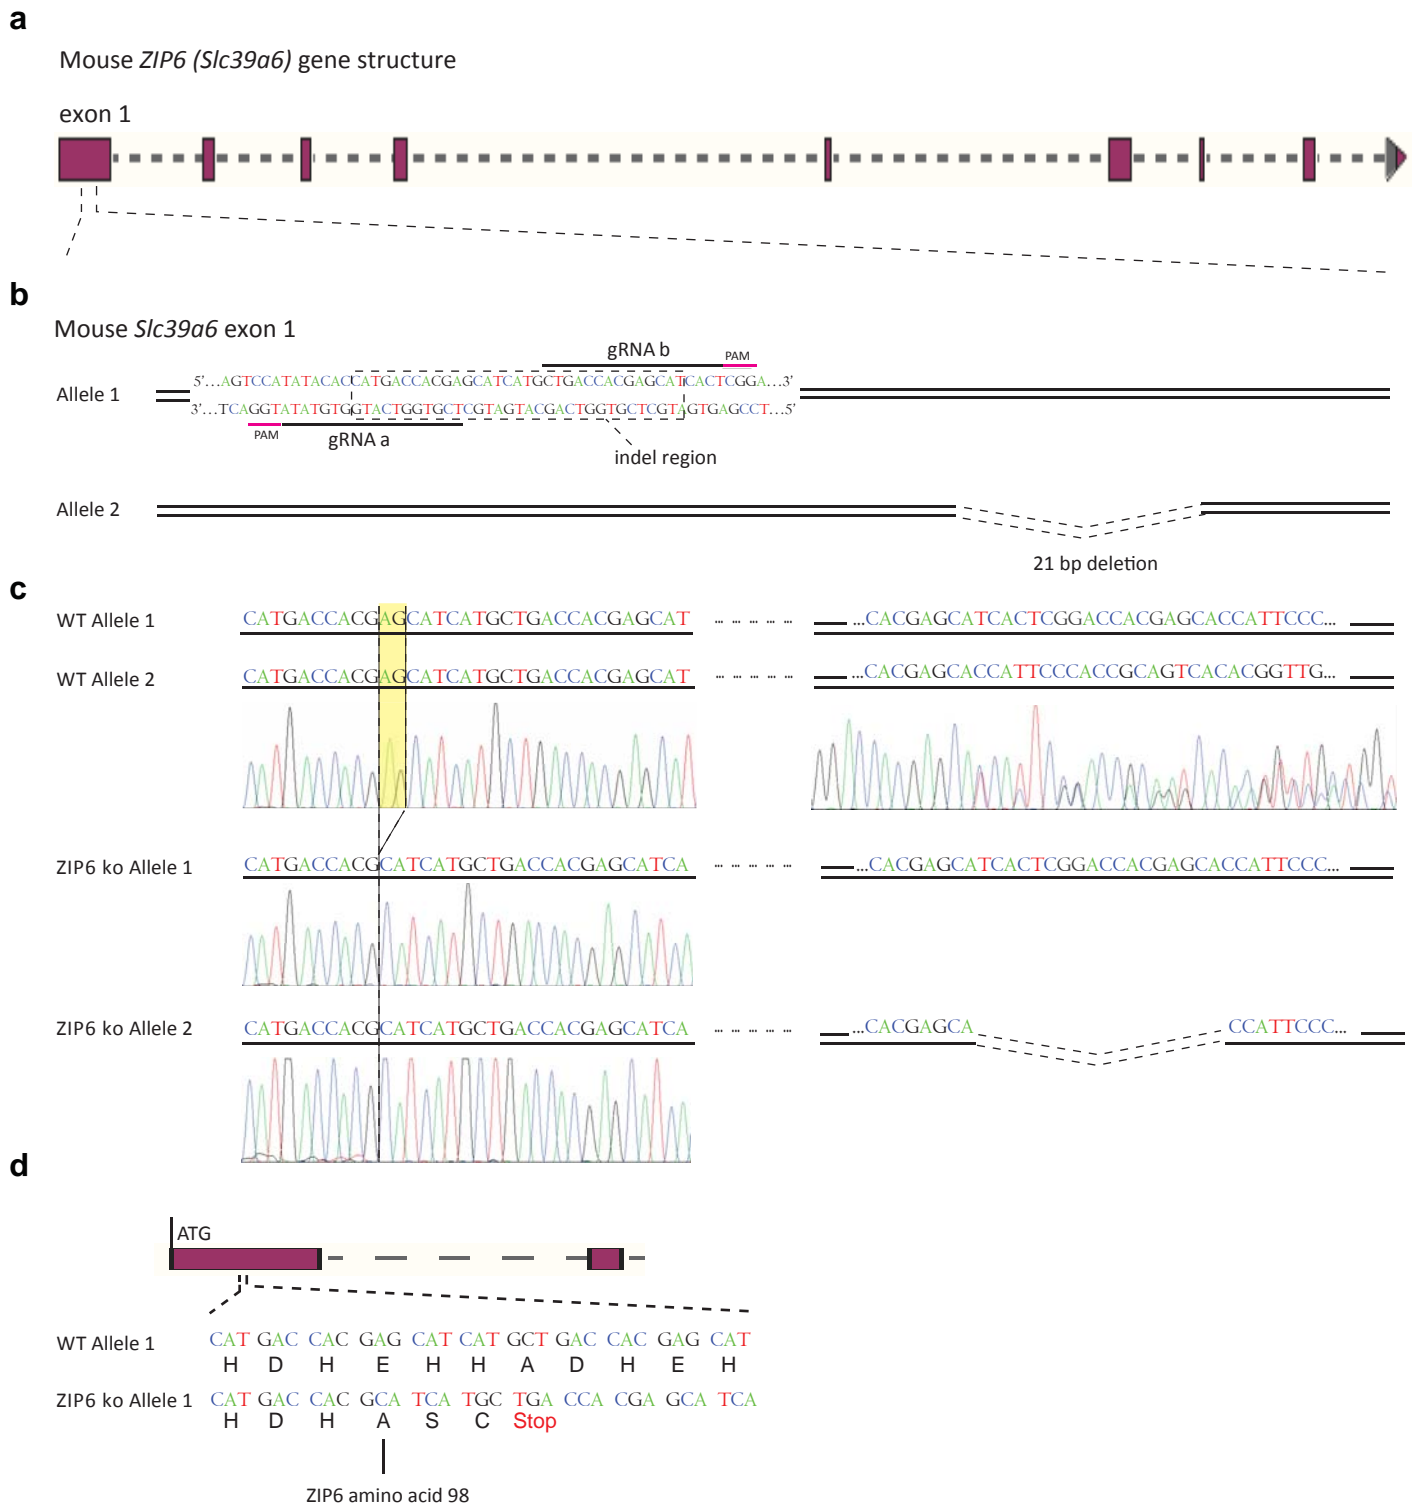

**Table S1: The ZIP6 interactome in mouse NMuMG cells exhibiting a fibroblastoid morphology following 48 hrs of TGFβ1 treatment**

| Accession    | Description                                                              | Description (curated)                        | Coverage | Proteins | Unique | Total | PSMs | 126/131 | Var. [%] | 127/131 | Var. [%] | 128/131 | Var. [%] | 129/131 | Var. [%] | 130/131 | Var. [%] | Count | # AAs | MW [kDa] | calc. pI |
|--------------|--------------------------------------------------------------------------|----------------------------------------------|----------|----------|--------|-------|------|---------|----------|---------|----------|---------|----------|---------|----------|---------|----------|-------|-------|----------|----------|
| IP0046900.4  | Zinc transporter ZIP6                                                    | Zinc transporter ZIP6                        | 29.28%   | 2        | 10     | 23    | 101  | 9,085   | 427.2    | 1,000   | 0.0      | 7,790   | 654.8    | 1,000   | 0.0      | 7,976   | 324.9    | 27    | 765   | 86.3     | 6.84     |
| IP00989517.1 | Uncharacterized protein (Fragment)                                       | Neural Cell Adhesion Molecule 1              | 42.19%   | 7        | 6      | 21    | 59   | 13,952  | 94.7     | 1,000   | 58.1     | 13,132  | 75.2     | 1,000   | 47.2     | 10,828  | 45.8     | 11    | 839   | 92.3     | 4.88     |
| IP00123639.1 | Calreticulin                                                             | Calreticulin                                 | 10.82%   | 1        | 1      | 6     | 19   | 8,139   | 6.0      | 0.393   | 16.7     | 10,486  | 11.3     | 0.863   | 1.5      | 7,846   | 7.6      | 3     | 416   | 48.0     | 4.49     |
| IP00273801.3 | Zinc transporter ZIP10                                                   | Zinc transporter ZIP10                       | 18.97%   | 2        | 11     | 16    | 78   | 6,653   | 113.4    | 1,000   | 7.0      | 7,012   | 219.1    | 1,000   | 0.0      | 5,972   | 104.3    | 31    | 833   | 94.3     | 6.71     |
| IP00111218.1 | Aldehyde dehydrogenase, mitochondrial                                    | Aldehyde dehydrogenase                       | 42.00%   | 2        | 3      | 15    | 50   | 2,452   | 62.0     | 1,091   | 13.0     | 2,718   | 206.5    | 1,023   | 11.5     | 2,788   | 176.4    | 7     | 519   | 56.5     | 7.62     |
| IP00230108.6 | Protein disulfide-isomerase A3                                           | Protein disulfide-isomerase A3               | 30.30%   | 2        | 5      | 12    | 37   | 2,579   | 83.9     | 1,000   | 5.5      | 3,195   | 138.5    | 1,000   | 19.0     | 2,096   | 71.5     | 13    | 505   | 56.6     | 6.21     |
| IP00463589.2 | Uncharacterized protein                                                  | ATPase, Ca++ transporting, plasma membrane 4 | 41.64%   | 5        | 6      | 33    | 56   | 3,026   | 128.1    | 1,000   | 0.0      | 1,971   | 74.9     | 1,000   | 1.8      | 1,612   | 19.5     | 7     | 1172  | 129.2    | 6.73     |
| IP00319994.6 | L-lactate dehydrogenase A chain                                          | L-lactate dehydrogenase A chain              | 44.88%   | 4        | 3      | 12    | 41   | 1,951   | 32.0     | 1,340   | 45.5     | 1,674   | 89.1     | 1,261   | 35.4     | 2,284   | 38.5     | 9     | 332   | 36.5     | 7.74     |
| IP00127841.3 | ADP/ATP translocase 2                                                    | ADP/ATP translocase 2                        | 42.62%   | 2        | 4      | 9     | 23   | 1,578   | 27.9     | 0.887   | 9.6      | 2,000   | 40.0     | 0.985   | 15.0     | 1,639   | 15.0     | 6     | 298   | 32.9     | 9.73     |
| IP00223060.1 | Phosphoenolpyruvate carboxykinase [GTP], mitochondrial                   | Phosphoenolpyruvate carboxykinase            | 18.44%   | 2        | 5      | 10    | 24   | 1,475   | 42.4     | 1,146   | 46.9     | 1,613   | 72.0     | 1,134   | 59.1     | 1,786   | 88.6     | 13    | 667   | 73.4     | 7.74     |
| IP00135130.3 | Neutral amino acid transporter A                                         | Neutral amino acid transporter A             | 40.79%   | 1        | 9      | 16    | 156  | 1,541   | 26.7     | 0.950   | 32.2     | 1,858   | 37.5     | 0.896   | 16.4     | 1,458   | 29.4     | 49    | 532   | 56.0     | 5.87     |
| IP00624175.1 | Isoform 1 of Lysophosphatidic acid phosphatase type 6                    | Lysophosphatidic acid phosphatase type 6     | 49.28%   | 4        | 8      | 17    | 58   | 1,794   | 38.1     | 0.991   | 34.6     | 1,559   | 38.0     | 0.960   | 26.3     | 1,496   | 32.2     | 20    | 418   | 47.6     | 7.72     |
| IP00122928.1 | Tubulin beta-6 chain                                                     | Tubulin beta-6 chain                         | 39.82%   | 2        | 2      | 13    | 38   | 1,481   | 20.9     | 0.882   | 43.4     | 1,596   | 55.3     | 0.921   | 27.9     | 1,575   | 59.6     | 6     | 447   | 50.1     | 4.89     |
| IP00554989.3 | Peptidyl-prolyl cis-trans isomerase                                      | Peptidyl-prolyl cis-trans isomerase          | 34.73%   | 5        | 3      | 7     | 9    | 1,795   | 30.6     | 0.920   | 16.2     | 1,551   | 17.9     | 0.783   | 25.2     | 1,246   | 31.4     | 3     | 167   | 18.3     | 7.90     |
| IP00622795.2 | Glyceraldehyde-3-phosphate dehydrogenase                                 | Glyceraldehyde-3-phosphate dehydrogenase     | 36.64%   | 28       | 3      | 13    | 52   | 1,389   | 45.8     | 0.926   | 11.4     | 1,748   | 20.3     | 0.889   | 103.2    | 1,418   | 39.2     | 13    | 333   | 35.8     | 8.03     |
| IP00117348.4 | Tubulin alpha-1B chain                                                   | Tubulin alpha-1B chain                       | 41.24%   | 4        | 1      | 14    | 53   | 1,555   | 19.0     | 1,057   | 13.7     | 1,520   | 20.1     | 1,003   | 21.9     | 1,424   | 30.3     | 20    | 451   | 50.1     | 5.06     |
| IP00110753.1 | Tubulin alpha-1A chain                                                   | Tubulin alpha-1A chain                       | 41.24%   | 5        | 1      | 13    | 53   | 1,474   | 19.7     | 1,048   | 14.9     | 1,490   | 20.2     | 1,003   | 21.9     | 1,378   | 31.7     | 20    | 451   | 50.1     | 5.06     |
| IP00117352.1 | Tubulin beta-5 chain                                                     | Tubulin beta-5 chain                         | 52.70%   | 6        | 5      | 21    | 57   | 1,234   | 32.3     | 0.977   | 34.5     | 1,587   | 68.6     | 0.885   | 38.5     | 1,493   | 48.7     | 13    | 444   | 49.6     | 4.89     |
| IP00874456.1 | Dihydropyridyl dehydrogenase, mitochondrial                              | Dihydropyridyl dehydrogenase                 | 36.94%   | 2        | 3      | 18    | 43   | 1,578   | 69.4     | 0.975   | 54.4     | 1,266   | 31.1     | 0.952   | 62.5     | 1,463   | 74.1     | 6     | 509   | 54.2     | 7.80     |
| IP00118108.1 | Tetraspanin-6                                                            | Tetraspanin-6                                | 21.22%   | 1        | 1      | 3     | 8    | 1,617   | 4.4      | 1,065   | 8.2      | 1,387   | 16.0     | 0.603   | 57.2     | 1,228   | 19.4     | 4     | 245   | 27.3     | 7.74     |
| IP00895479.1 | Uncharacterized protein                                                  | KxkL motif-containing protein 1              | 53.02%   | 17       | 3      | 10    | 24   | 1,527   | 51.4     | 1,000   | 0.6      | 1,469   | 64.5     | 1,000   | 46.6     | 1,194   | 13.1     | 6     | 232   | 26.8     | 9.83     |
| IP00230351.1 | Succinate dehydrogenase [ubiquinone] flavoprotein subunit, mitochondrial | Succinate dehydrogenase flavoprotein subunit | 44.28%   | 1        | 4      | 24    | 64   | 1,399   | 62.2     | 1,083   | 36.8     | 1,402   | 48.4     | 0.949   | 70.2     | 1,257   | 19.7     | 9     | 664   | 72.5     | 7.37     |
| IP00229517.5 | Galectin-1                                                               | Galectin-1                                   | 53.33%   | 1        | 2      | 6     | 15   | 1,658   | 29.2     | 1,035   | 43.1     | 1,318   | 30.7     | 0.980   | 33.9     | 1,080   | 18.2     | 4     | 135   | 14.9     | 5.49     |
| IP00407130.4 | Isoform M2 of Pyruvate kinase isozymes M1/M2                             | Pyruvate kinase isozymes M1/M2               | 33.71%   | 4        | 5      | 17    | 41   | 1,262   | 20.0     | 0.955   | 61.3     | 1,362   | 44.6     | 1,243   | 33.5     | 1,370   | 31.2     | 10    | 531   | 57.8     | 7.47     |
| IP00121440.4 | Electron transfer flavoprotein subunit beta                              | Electron transfer flavoprotein subunit beta  | 37.65%   | 1        | 3      | 9     | 18   | 1,173   | 23.1     | 0.750   | 18.2     | 1,427   | 1.8      | 0.949   | 16.1     | 1,390   | 18.6     | 4     | 255   | 27.6     | 8.10     |
| IP00399958.3 | Calumenin isoform 2                                                      | Calumenin isoform 2                          | 24.44%   | 6        | 3      | 6     | 20   | 1,493   | 38.5     | 1,095   | 15.9     | 1,208   | 16.2     | 0.970   | 145.1    | 1,283   | 56.1     | 7     | 315   | 37.1     | 4.59     |
| IP00331556.5 | Heat shock 70 kDa protein 4                                              | Heat shock 70 kDa protein 4                  | 51.61%   | 1        | 10     | 36    | 104  | 1,453   | 30.5     | 0.972   | 14.8     | 1,279   | 22.4     | 0.964   | 23.3     | 1,224   | 30.7     | 23    | 841   | 94.1     | 5.24     |
| IP00338536.1 | Succinate dehydrogenase [ubiquinone] iron-sulfur subunit, mitochondrial  | Succinate dehydrogenase iron-sulfur subunit  | 60.99%   | 2        | 5      | 20    | 53   | 1,287   | 12.1     | 1,090   | 20.8     | 1,361   | 26.8     | 1,089   | 23.6     | 1,298   | 13.9     | 7     | 282   | 31.8     | 8.68     |
| IP00263863.8 | 10 kDa heat shock protein, mitochondrial                                 | 10 kDa heat shock protein                    | 80.39%   | 3        | 6      | 10    | 46   | 1,403   | 37.2     | 0.859   | 22.0     | 1,233   | 22.5     | 0.846   | 26.9     | 1,305   | 16.8     | 17    | 102   | 11.0     | 8.35     |
| IP00323592.2 | Malate dehydrogenase, mitochondrial                                      | Malate dehydrogenase                         | 84.32%   | 1        | 11     | 23    | 66   | 1,252   | 22.8     | 0.961   | 13.9     | 1,322   | 23.0     | 0.917   | 14.3     | 1,338   | 16.5     | 20    | 338   | 35.6     | 8.68     |
| IP00875833.2 | Monofunctional C1-tetrahydrofolate synthase, mitochondrial               | Monofunctional C1-tetrahydrofolate synthase  | 43.50%   | 1        | 11     | 38    | 90   | 1,064   | 37.7     | 1,000   | 31.5     | 1,251   | 35.7     | 0.903   | 28.2     | 1,492   | 25.3     | 18    | 977   | 105.7    | 7.02     |
| IP00117083.1 | GrpE protein homolog 1, mitochondrial                                    | GrpE protein homolog 1                       | 26.73%   | 1        | 6      | 7     | 12   | 1,190   | 29.3     | 0.951   | 33.6     | 1,318   | 91.0     | 0.951   | 61.0     | 1,231   | 21.5     | 7     | 217   | 24.3     | 8.38     |
| IP00454049.4 | Enoyl-CoA hydratase, mitochondrial                                       | Enoyl-CoA hydratase                          | 58.97%   | 3        | 13     | 17    | 146  | 1,082   | 23.1     | 0.850   | 22.1     | 1,384   | 15.2     | 0.944   | 21.6     | 1,220   | 22.2     | 47    | 290   | 31.5     | 8.48     |
| IP00648141.1 | Glycogen synthase kinase-3 alpha                                         | Glycogen synthase kinase-3 alpha             | 50.61%   | 13       | 6      | 19    | 88   | 1,056   | 16.6     | 1,000   | 31.3     | 1,404   | 28.3     | 0.979   | 10.6     | 1,177   | 24.5     | 24    | 490   | 51.6     | 8.61     |
| IP00318614.9 | Iso citrate dehydrogenase [NADP], mitochondrial                          | Iso citrate dehydrogenase [NADP]             | 31.19%   | 2        | 7      | 13    | 35   | 1,156   | 21.7     | 0.923   | 19.4     | 1,225   | 14.7     | 1,000   | 31.7     | 1,245   | 26.8     | 11    | 452   | 50.9     | 8.69     |
| IP00114209.1 | Glutamate dehydrogenase 1, mitochondrial                                 | Glutamate dehydrogenase 1                    | 35.66%   | 2        | 11     | 20    | 43   | 1,092   | 16.6     | 0.937   | 9.6      | 1,125   | 17.9     | 0.965   | 36.6     | 1,383   | 35.8     | 14    | 558   | 61.3     | 8.00     |
| IP00671957.2 | Glutaminase isoform 2                                                    | Glutaminase isoform 2                        | 52.90%   | 5        | 6      | 18    | 49   | 1,196   | 38.0     | 1,020   | 40.6     | 1,157   | 50.8     | 0.884   | 25.2     | 1,237   | 48.1     | 14    | 603   | 66.0     | 8.12     |
| IP00125319.1 | Glycogen synthase kinase-3 beta                                          | Glycogen synthase kinase-3 beta              | 50.48%   | 5        | 6      | 17    | 116  | 1,235   | 33.5     | 0.852   | 29.3     | 1,220   | 30.2     | 1,000   | 29.3     | 1,111   | 24.1     | 36    | 420   | 46.7     | 8.78     |
| IP00308885.6 | Isoform 1 of 60 kDa heat shock protein, mitochondrial                    | 60 kDa heat shock protein                    | 64.75%   | 4        | 19     | 35    | 193  | 1,127   | 16.5     | 0.950   | 14.6     | 1,201   | 19.9     | 0.821   | 23.6     | 1,219   | 16.5     | 60    | 573   | 60.9     | 6.18     |
| IP00111960.2 | Lysosomal alpha-glucosidase                                              | Lysosomal alpha-glucosidase                  | 28.23%   | 5        | 5      | 19    | 46   | 1,270   | 7.7      | 1,079   | 21.8     | 1,170   | 12.5     | 0.937   | 12.6     | 1,103   | 17.2     | 9     | 953   | 106.2    | 5.83     |
| IP00113141.1 | Citrate synthase, mitochondrial                                          | Citrate synthase                             | 38.36%   | 1        | 4      | 19    | 52   | 1,111   | 23.3     | 0.920   | 24.0     | 1,202   | 11.7     | 0.865   | 15.2     | 1,229   | 16.9     | 12    | 464   | 51.7     | 8.57     |
| IP00116074.1 | Aconitate hydratase, mitochondrial                                       | Aconitate hydratase                          | 39.10%   | 1        | 13     | 25    | 82   | 1,133   | 32.3     | 0.832   | 26.8     | 1,216   | 24.5     | 0.930   | 25.5     | 1,164   | 26.2     | 24    | 780   | 85.4     | 7.93     |
| IP00118825.2 | Citrate synthase-like protein                                            | Citrate synthase-like protein                | 43.13%   | 1        | 3      | 18    | 57   | 1,174   | 34.7     | 1,002   | 21.4     | 1,151   | 20.2     | 0.916   | 18.6     | 1,173   | 19.2     | 8     | 466   | 52.3     | 8.79     |
| IP00319992.1 | 78 kDa glucose-regulated protein                                         | 78 kDa glucose-regulated protein             | 30.38%   | 1        | 10     | 21    | 109  | 1,045   | 27.0     | 1,000   | 25.9     | 1,229   | 35.3     | 1,034   | 29.6     | 1,167   | 27.5     | 30    | 655   | 72.4     | 5.16     |
| IP00117312.1 | Aspartate aminotransferase, mitochondrial                                | Aspartate aminotransferase                   | 43.02%   | 1        | 7      | 14    | 73   | 1,160   | 24.9     | 1,000   | 20.5     | 1,061   | 23.8     | 0.895   | 17.2     | 1,194   | 18.1     | 27    | 430   | 47.4     | 9.00     |
| IP00459725.2 | Isoform 1 of Isocitrate dehydrogenase [NAD] subunit alpha, mitochondrial | Isocitrate dehydrogenase [NAD] subunit alpha | 32.51%   | 2        | 6      | 12    | 36   | 1,130   | 45.2     | 0.873   | 17.7     | 1,130   | 39.5     | 0.896   | 15.7     | 1,116   | 9.4      | 10    | 366   | 39.6     | 6.73     |
